# Supplementary material for: Brazil Nut (Bertholletia excelsa, Lecythidaceae) Regeneration in Logging Gaps in the Peruvian Amazon
Source: Hindawi journal article supplement (doi:10.1155/2014/420764), 2014-01-01
Supplement: f1 [file 420764.f1.pdf]

1

2 **Supplementary materials**

| Brazil nut concession |           | Productive Brazil nut trees |         | Unshelled Brazil nut harvest (kg yr <sup>-1</sup> ) * | Gap 1                  |         |          | Gap 2                  |         |          | Gap 3                  |         |          |
|-----------------------|-----------|-----------------------------|---------|-------------------------------------------------------|------------------------|---------|----------|------------------------|---------|----------|------------------------|---------|----------|
| ID                    | Area (Ha) | #                           | Density |                                                       | Area (m <sup>2</sup> ) | Lat (S) | Long (W) | Area (m <sup>2</sup> ) | Lat (S) | Long (W) | Area (m <sup>2</sup> ) | Lat (S) | Long (W) |
| 1                     | 290.6     | 174                         | 0.528   | 6659.8                                                | 246                    | 12.142  | 69.142   | 223                    | 12.152  | 69.134   | 224                    | 12.153  | 69.136   |
| 2                     | 801.5     | 405                         | 0.505   | 15525.3                                               | 240                    | 12.120  | 69.151   | 198                    | 12.119  | 69.151   | 200                    | 12.111  | 69.149   |
| 3                     | 932.7     | 275                         | 0.513   | 18540.2                                               | 201                    | 12.074  | 69.094   | 235                    | 12.075  | 69.094   | 219                    | 12.072  | 69.093   |
| 4                     | 1083.0    | -                           | -       | 19617.5                                               | 178                    | 12.089  | 69.048   | 120                    | 12.092  | 69.051   | 160                    | 12.094  | 69.044   |
| 5                     | 749.1     | -                           | -       | 19110.0                                               | 213                    | 12.138  | 69.081   | 252                    | 12.138  | 69.079   | 227                    | 12.140  | 69.082   |
| 6                     | 765.4     | -                           | -       | 23085.3                                               | 196                    | 12.120  | 69.014   | 203                    | 12.119  | 69.016   | 182                    | 12.118  | 69.015   |
| 7                     | 279.1     | -                           | -       | 7289.8                                                | 190                    | 12.265  | 69.036   | 290                    | 12.265  | 69.036   | 182                    | 12.268  | 69.039   |
| 8                     | 1076.4    | -                           | -       | 31509.1                                               | 243                    | 12.234  | 69.037   | 220                    | 12.235  | 69.036   | 175                    | 12.236  | 69.036   |
| 9                     | 277.5     | 300                         | 0.995   | 12194.7                                               | 220                    | 12.268  | 69.043   | 160                    | 12.268  | 69.043   | 201                    | 12.268  | 69.040   |
| 10                    | 715.4     | -                           | -       | 11909.1                                               | 165                    | 12.224  | 69.047   | 284                    | 12.233  | 69.037   | 175                    | 12.223  | 69.047   |
| 11                    | 191.3     | 186                         | 0.972   | 8325.1                                                | 221                    | 12.259  | 69.131   | 246                    | 12.260  | 69.132   | 223                    | 12.260  | 69.131   |
| 12                    | 152.3     | 256                         | 1.694   | -                                                     | 263                    | 12.268  | 69.132   | 250                    | 12.269  | 69.133   | 213                    | 12.269  | 69.134   |
| 13                    | 125.8     | 95                          | 0.752   | 4454.8                                                | 268                    | 12.278  | 69.128   | 213                    | 12.278  | 69.129   | 230                    | 12.278  | 69.130   |
| 14                    | 654.5     | 331                         | 0.506   | 17290.0                                               | 244                    | 12.276  | 69.171   | 229                    | 12.278  | 69.171   | 220                    | 12.273  | 69.174   |
| 15                    | 242.9     | 119                         | 0.582   | 4904.9                                                | 255                    | 12.297  | 69.129   | 244                    | 12.298  | 69.130   | 204                    | 12.296  | 69.129   |
| 16                    | 771.4     | 318                         | 0.412   | 11760.0                                               | 219                    | 12.164  | 69.273   | 268                    | 12.162  | 69.275   | 225                    | 12.160  | 69.278   |

3 \* as reported to the POA for the 2010-2011 harvest season.

4

5 **Supplementary materials A.** The Brazil nut concession ID, total area (ha) and number and density of Brazil nut trees, and the area (m<sup>2</sup>),  
6 and location (decimal degree) of the logging gaps (3 per concession) included in this study.

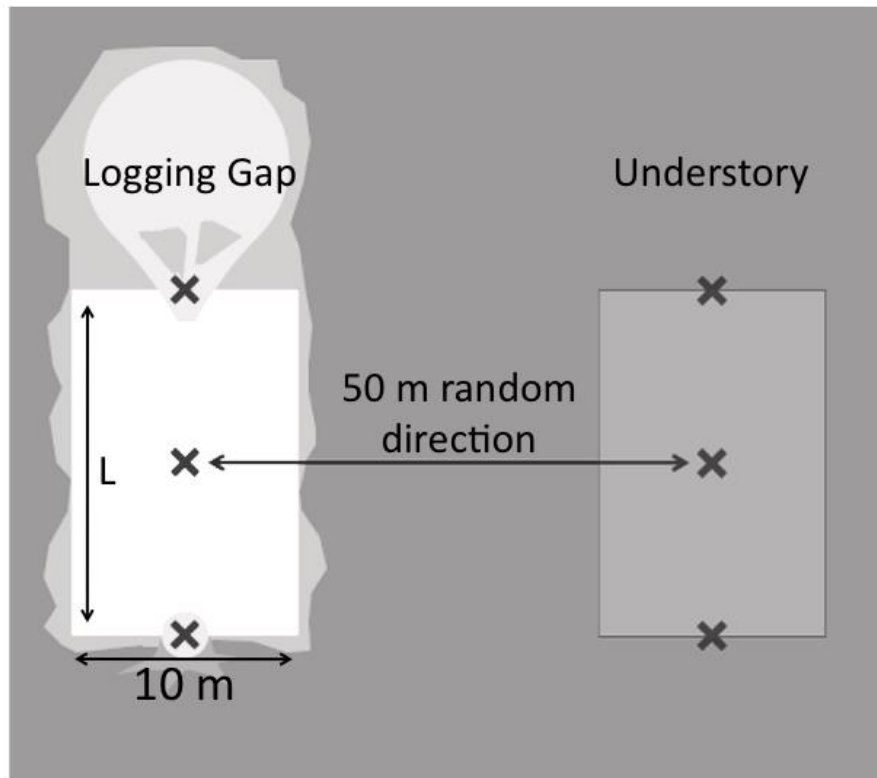

7

8 **Supplementary materials B.** Diagram showing plot design. Each logging gap and paired  
 9 understory plot was rectangular, with a width of 10m and a length (L) determined by the  
 10 distance between the stump and the first bifurcation of branches in the fallen crown of the  
 11 tree. Black X's mark where each set of four densiometer measurements were taken at the  
 12 stump, center, and bifurcation, and the corresponding areas in the paired understory plot.

| Height (cm)                        |               |            |            |            |                 |     |
|------------------------------------|---------------|------------|------------|------------|-----------------|-----|
|                                    | Tree-fall Gap |            | Understory |            | T-test          |     |
|                                    | Mean          | ±Std. dev. | Mean       | ±Std. dev. | <i>p</i> -value |     |
| August                             | 17.16         | 4.04       | 17.64      | 4.29       | 0.687           |     |
| September                          | 17.77         | 3.99       | 18.27      | 5.45       | 0.738           |     |
| October                            | 19.13         | 4.35       | 18.87      | 5.67       | 0.947           |     |
| November                           | 21.95         | 6.44       | 18.99      | 5.75       | 0.136           |     |
| December                           | 26.79         | 10.29      | 18.80      | 6.59       | 0.003           | **  |
| January                            | 31.83         | 18.38      | 19.03      | 6.15       | 0.011           | *   |
| February                           | 36.15         | 20.49      | 19.77      | 5.93       | 0.014           | *   |
| Total Leaf Area (cm <sup>2</sup> ) |               |            |            |            |                 |     |
| August                             | 253.18        | 66.24      | 258.44     | 79.93      | 0.805           |     |
| September                          | 203.92        | 70.15      | 194.25     | 85.74      | 0.690           |     |
| October                            | 208.80        | 77.81      | 172.41     | 79.13      | 0.178           |     |
| November                           | 287.50        | 150.18     | 180.45     | 84.98      | 0.008           | **  |
| December                           | 367.52        | 241.50     | 185.32     | 98.25      | 0.003           | **  |
| January                            | 480.10        | 360.17     | 160.05     | 96.25      | 0.005           | **  |
| February                           | 548.42        | 394.27     | 169.95     | 98.49      | 0.009           | **  |
| Leaf Number #                      |               |            |            |            |                 |     |
| August                             | 10.63         | 3.01       | 10.41      | 2.95       | 0.797           |     |
| September                          | 9.47          | 3.56       | 7.52       | 3.34       | 0.064           |     |
| October                            | 8.70          | 3.76       | 6.00       | 3.04       | 0.020           | *   |
| November                           | 10.52         | 3.91       | 5.87       | 3.21       | < 0.001         | *** |
| December                           | 12.20         | 4.54       | 5.90       | 3.19       | < 0.001         | *** |
| January                            | 14.04         | 6.12       | 4.80       | 2.91       | < 0.001         | *** |
| February                           | 15.96         | 8.16       | 4.85       | 3.24       | 0.004           | **  |

| Canopy Openness (%) |       |       |       |      |         |     |
|---------------------|-------|-------|-------|------|---------|-----|
| August              | 29.46 | 11.51 | 9.73  | 2.64 | < 0.001 | *** |
| September           | 33.64 | 14.05 | 10.63 | 2.94 | < 0.001 | *** |
| October             | 26.13 | 6.10  | 10.38 | 2.79 | < 0.001 | *** |
| November            | 28.69 | 5.88  | 6.23  | 1.48 | < 0.001 | *** |
| December            | 27.72 | 9.70  | 7.56  | 3.76 | < 0.001 | *** |
| January             | 25.01 | 8.93  | 6.33  | 2.88 | < 0.001 | *** |
| February            | 26.52 | 8.30  | 9.90  | 4.11 | < 0.001 | *** |

13 **Supplementary materials C.** Seedling height (cm) and total leaf area (cm<sup>2</sup>) and canopy  
14 openness (%) for 32 seedling pairs planted across five paired tree-fall gap and understory  
15 sites, with mean and  $\pm$ std. dev. All t-tests were tested against a bonferroni corrected  $\alpha$ -value  
16 of 0.0083, *p*-value significance is marked with an \* = <0.05, \*\* = < 0.01, and \*\*\* = < 0.001

17
